# Supplementary material
Source: MDPI journal article supplement (https://www.mdpi.com/2076-3417/10/18/6313)
Supplement: s1 [file s1]

Supplementary

# Inhibitory Effects of 4-Hexylresorcinol on Root Resorption Induced by Orthodontic Tooth Movement

Jun-Kyu Jang<sup>1</sup>, Dae-Won Kim<sup>2</sup>, Seong-Gon Kim<sup>3,\*</sup> and Tae-Woo Kim<sup>1,\*</sup>

<sup>1</sup> Department of Orthodontics, School of Dentistry, Seoul National University, Seoul 3080, Korea; jjkyu83@gmail.com

<sup>2</sup> Department of Oral Biochemistry, College of Dentistry, Gangneung-Wonju National University, Gangneung 28644, Korea; kimdw@gwnu.ac.kr

<sup>3</sup> Department of Oral and Maxillofacial Surgery, College of Dentistry, Gangneung-Wonju National University, Gangneung 28644, Korea

\* Correspondence: kims@gwnu.ac.kr (K.S.G.); taewoo@snu.ac.kr (K.T.W.); Tel.: +82-33-640-2468 (K.S.G.); +82-2-2072-2678 (K.T.W.)

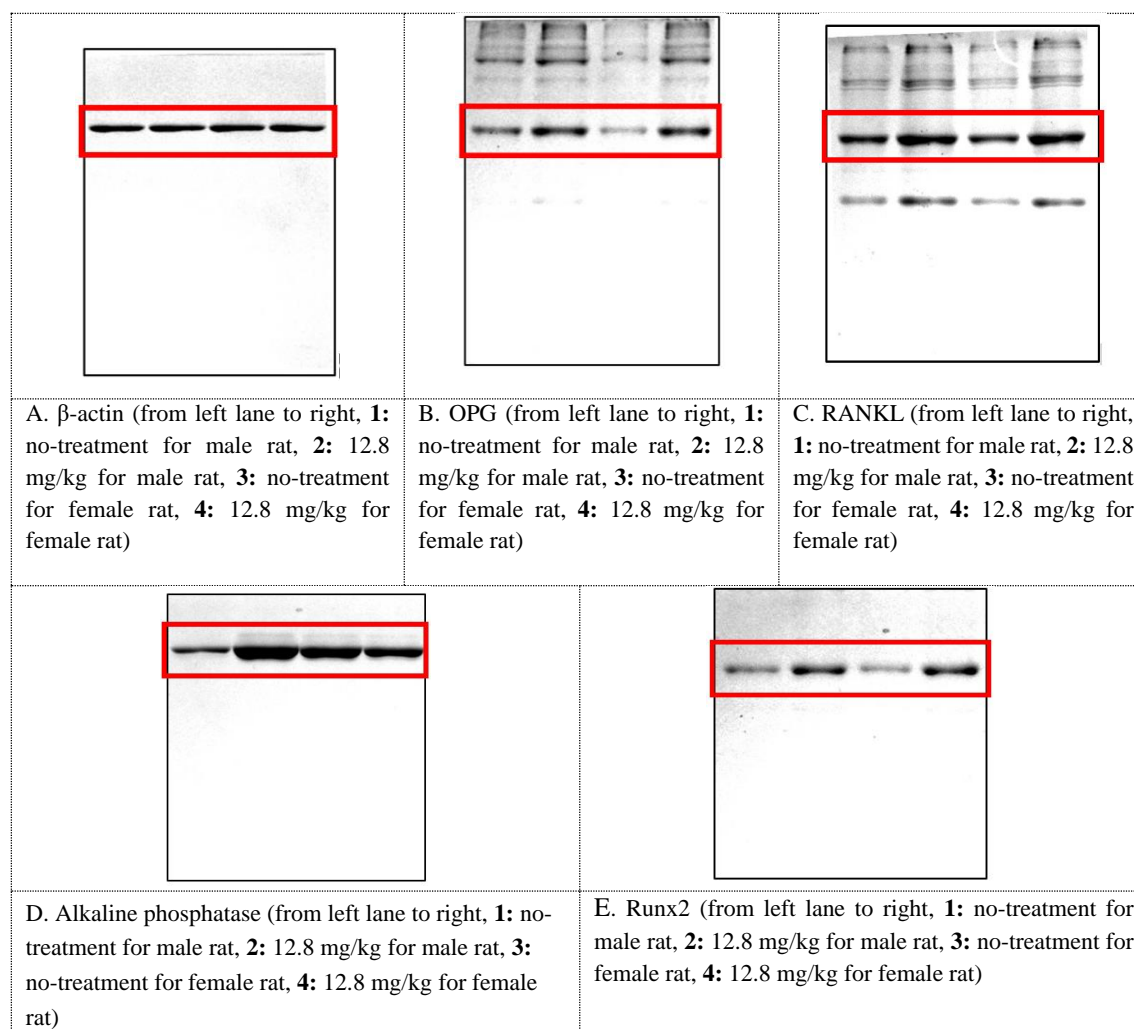

**Figure S1.** Full length blot of Figure 4. Application of 4HR increased the expression level of OPG, RANKL, alkaline phosphatase, and Runx2.
